# Supplementary material
Source: PubMed Central journal article supplement (PMC3607190)
Supplement: 97320630009309S1.pdf [file 97320630009309S1.pdf]

## Supplementary material:

**Table 1:** S score of active compounds against NS3/4A protease

| Compounds | HCV NS3/4A IC50 (nM) | Docking Scores | p Docking Scores |
|-----------|----------------------|----------------|------------------|
| 01        | 0.4                  | -8.0244        | 0.9044           |
| 02        | 0.4                  | -8.5920        | 0.9341           |
| 03        | 1.6                  | -8.3509        | 0.922            |
| 04        | 2.4                  | -7.2393        | 0.8596           |
| 05        | <0.2                 | -8.9827        | 0.9534           |
| 06        | 0.4                  | -8.0881        | 0.908            |
| 07        | 1.0                  | -8.8505        | 0.95             |
| 08        | 0.6                  | -8.1709        | 0.912            |
| 09        | 0.4                  | -8.8220        | 0.95             |
| 10        | 5.6                  | -7.3732        | 0.868            |
| 11        | 4.1                  | -10.4351       | 1.02             |
